# Supplementary material for: Removal of Cd (II) Ions from Bioretention System by Clay and Soil Wettability
Source: MDPI journal article supplement (doi:10.3390/w13223164), 2021-11-10
Supplement: s1 [file s1]

Archive with 1 entries (1 files):
- water-1406184-supplementary.pdf
