# Supplementary material for: Removal of Cd (II) Ions from Bioretention System by Clay and Soil Wettability
Source: MDPI journal article supplement (doi:10.3390/w13223164), 2021-11-10
Supplement: s1 [file s1 › water-1406184-supplementary.pdf]

# Supportive Information

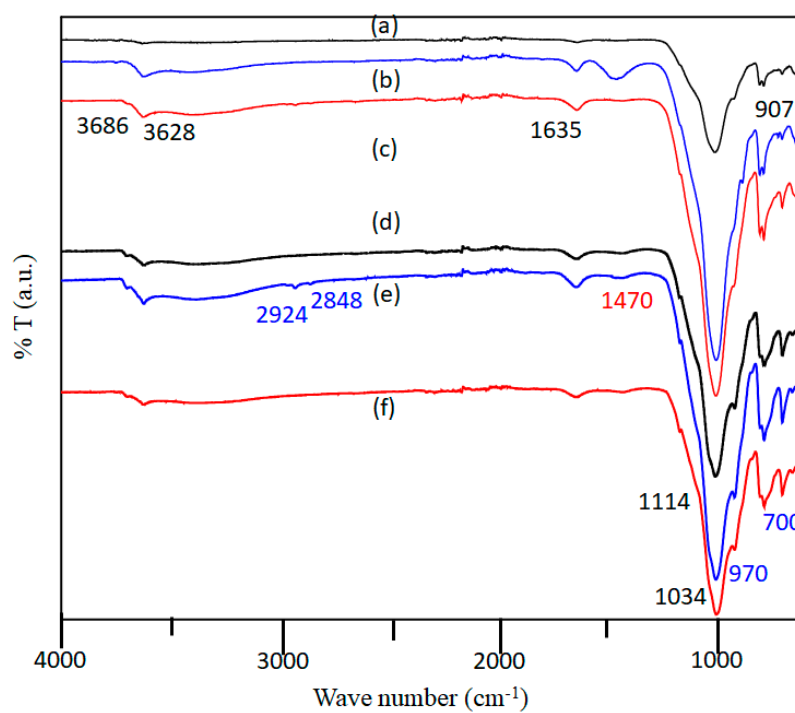

Figure S1 FT-IR absorption spectra of (a) clay; (b) clay OFS-B; (c) clay OFS-L; (d) soil; (e) soil OFS-B; (f) soil OFS-L
